# Supplementary material
Source: Springer Nature journal article supplement (https://www.springermedizin.de/resource/supplementary/12950_2012_279_MOESM5_ESM.pdf/9557524)

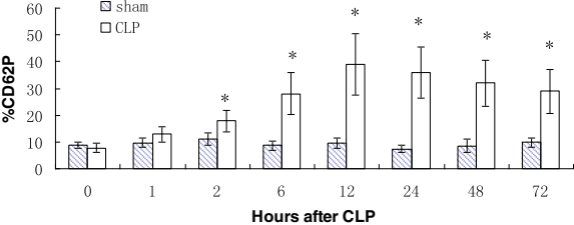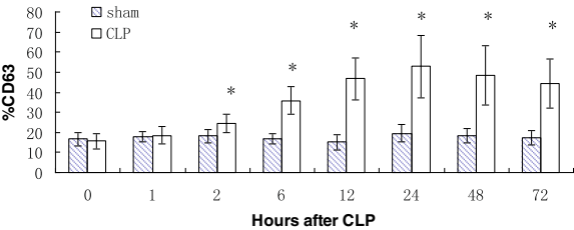

Supplement: MOESM5 [file 9557524]
